# Supplementary material for: Naphthalimide based fluorescent organic nanoparticles in selective sensing of Fe3+ and as a diagnostic probe for Fe2+/Fe3+ transition
Source: Royal Society of Chemistry journal article supplement (doi:10.1039/d0tb02450c), 2020-11-25
Supplement: d0tb02450c1.pdf [file d0tb02450c1.pdf]

## Electronic Supplementary Information (ESI)

### **Naphthalimide based fluorescent organic nanoparticle in selective sensing of Fe<sup>3+</sup> and as diagnostic probe for Fe<sup>2+</sup>/Fe<sup>3+</sup> transition**

Deblina Sarkar, Monalisa Chowdhury and Prasanta Kumar Das\*

*School of Biological Sciences, Indian Association for the Cultivation of Science  
Jadavpur, Kolkata – 700032, India.*

\*To whom correspondence should be addressed: [bcpkd@iacs.res.in](mailto:bcpkd@iacs.res.in)

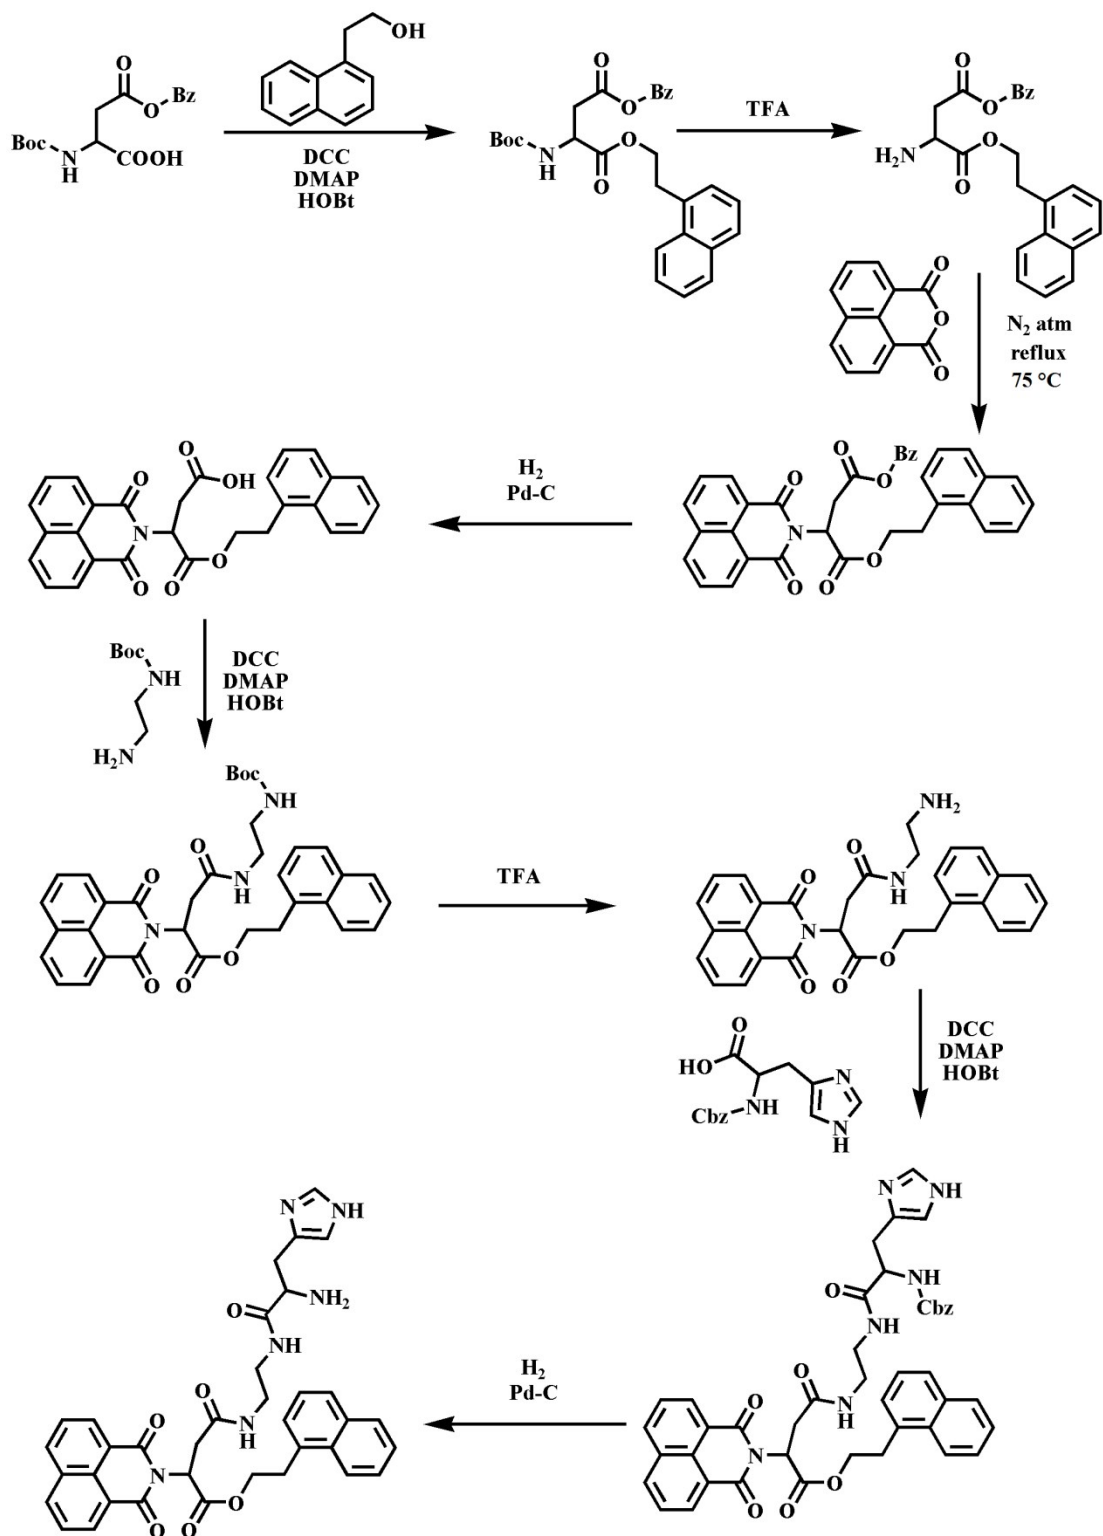

Scheme S1. Synthetic scheme of NID.

**Table S1** Comparison of Fe<sup>3+</sup> sensors.

| <b>Probes</b>                                                     | <b>LOD</b>                                       | <b>Response type</b>                       | <b>References</b>                                                  |
|-------------------------------------------------------------------|--------------------------------------------------|--------------------------------------------|--------------------------------------------------------------------|
| Rhodamine-based probe                                             | 0.1 $\mu$ M                                      | Fluorescence turn on                       | <i>Chem. Commun.</i> , 2010, <b>46</b> , 1407-1409.                |
| Boron-dipyrromethene (BODIPY) based fluorescence probe            | $1.3 \times 10^{-7}$ M                           | Fluorescence turn on                       | <i>ACS Appl. Mater. Interfaces</i> , 2014, <b>6</b> , 18408-18412. |
| Triphenylamine based probe                                        | 1.44 $\mu$ M                                     | AIE based Fluorescence turn off            | <i>J. Mater. Chem. C</i> , 2016, <b>4</b> , 383-390.               |
| Carbon quantum dots/block copolymer ensembles                     | 8.37 $\mu$ M                                     | Fluorescent sensing                        | <i>J. Mater. Chem. B</i> , 2017, <b>5</b> , 5397                   |
| carbon nanoparticles                                              | 0.55 ppm                                         | Fluorescent sensing                        | <i>J. Mater. Chem. A</i> , 2015, <b>3</b> , 136-138                |
| AgNp                                                              | 2 $\mu$ M                                        | Localised surface plasmon resonance        | <i>Colloids Surfaces A</i> , 2018, <b>555</b> , 324-331.           |
| Cyclodextrin Supramolecular Complex                               | 1 $\mu$ M                                        | FRET-based ratiometric sensor              | <i>Langmuir</i> , 2010, <b>26</b> , 4529-4534.                     |
| Naphthalene based sensor                                          | $3.53 \times 10^{-5}$ M                          | Fluorescence turn off                      | <i>Tetrahedron Lett</i> , 2010, <b>51</b> , 3962-3965.             |
| Rhodamine-based polymeric film sensor                             | 1 $\mu$ M                                        | FRET-based ratiometric fluorescent sensing | <i>Sens. Actuators B Chem.</i> , 2010, <b>145</b> , 451-456.       |
| Anionic poly(3,4-propylenedioxythiophene) derivative based sensor | 0.023 mM                                         | Colorimetric Sensor                        | <i>Sens. Actuators B Chem.</i> , 2017, <b>244</b> , 891-896        |
| Anionic Zn-based MOF                                              | 0.0233 mM                                        | Fluorescent sensing                        | <i>Dalton Trans.</i> , 2018, <b>47</b> , 3452-3458.                |
| <b>Naphthalimide derivative</b>                                   | <b>12.5<math>\pm</math>1.2 <math>\mu</math>M</b> | <b>Fluorescent Turn Off</b>                | <b>Present Study</b>                                               |

## Characterization of **NID**.

<sup>1</sup>H-NMR (400 MHz, CDCl<sub>3</sub>, 25 °C): δ/ppm: 8.500-8.539 (m, 3H, C-3, C-8 proton of naphthalimide, C-2 proton of imidazole), 8.365-8.389 (m, 2H, C-5, C-6 proton of naphthalimide), 7.853-7.964 (m, 4H, C-4, C-5, C-8 protons of naphthyl ring, C-5 proton of imidazole), 7.608-7.639 (m, 2H, C-4, C-7 protons of naphthalimide), 7.418-7.438 (d, 1H, C-7 proton of naphthyl ring), 7.336-7.372 (t, 1H, C-6 proton of naphthyl ring), 7.154-7.285 (m, 1H, C-3 proton of naphthyl ring), 6.967-7.005 (m, 1H, C-2 proton of naphthyl ring), 6.239-6.274 (m, 1H, chiral centre of L-aspartic acid residue), 5.071-5.091 (m, 2H, O-CH<sub>2</sub>-CH<sub>2</sub>-C<sub>10</sub>H<sub>7</sub>), 4.453-4.497 (m, 1H, chiral centre of L-histidine residue), 3.489-3.569 (m, 6H, -N-CH<sub>2</sub>-CH<sub>2</sub>-N- and O-CH<sub>2</sub>-CH<sub>2</sub>-C<sub>10</sub>H<sub>7</sub>), 3.274-3.366 (m, 2H, methylene protons of L-histidine residue), 2.969-3.029 (m, 2H, methylene protons of L-aspartic acid residue). <sup>13</sup>C-NMR (400 MHz, CDCl<sub>3</sub>): 170.48, 168.95, 160.68, 135.43, 134.55, 134.15, 133.55, 132.24, 131.95, 131.79, 128.98, 127.61, 127.44, 127.25, 127.16, 127.12, 126.16, 125.77, 125.63, 123.78, 119.08, 63.19, 50.05, 49.38, 36.35, 29.65, 28.97. MALDI-TOF: m/z: 647.69 [M+H]<sup>+</sup>(calculated); 647.039 (found).  $[\alpha]_D^{25} = -13.78^\circ$  (c = 0.58g/100mL) in CHCl<sub>3</sub>).

## Real time bioimaging.

We carried out real time bioimaging experiment for normal cells (NIH3T3) and cancer cells (B16F10) in 4 well chamber slides. First we incubated both type of cells separately in different chamber slides for 24 h (5% CO<sub>2</sub>) at 37 °C. Followed by we incubated **NID** FONPs in (25 μM,  $f_w = 99$  vol%) in both type of cells for 3 h and carried out fluorescence imaging. We took the cells within chamber slides again in the CO<sub>2</sub> incubator for another 3 h and carried out the same experiment till overall 6 h incubation of the FONPs. After that we incubated Fe<sup>2+</sup>(250 μM) and Fe<sup>3+</sup>(250 μM) separately in different wells of chamber slides where compound was already incubated. Subsequently, we carried out the imaging experiment for 6 h incubation of Fe<sup>2+</sup> and Fe<sup>3+</sup> included within both type of cells.

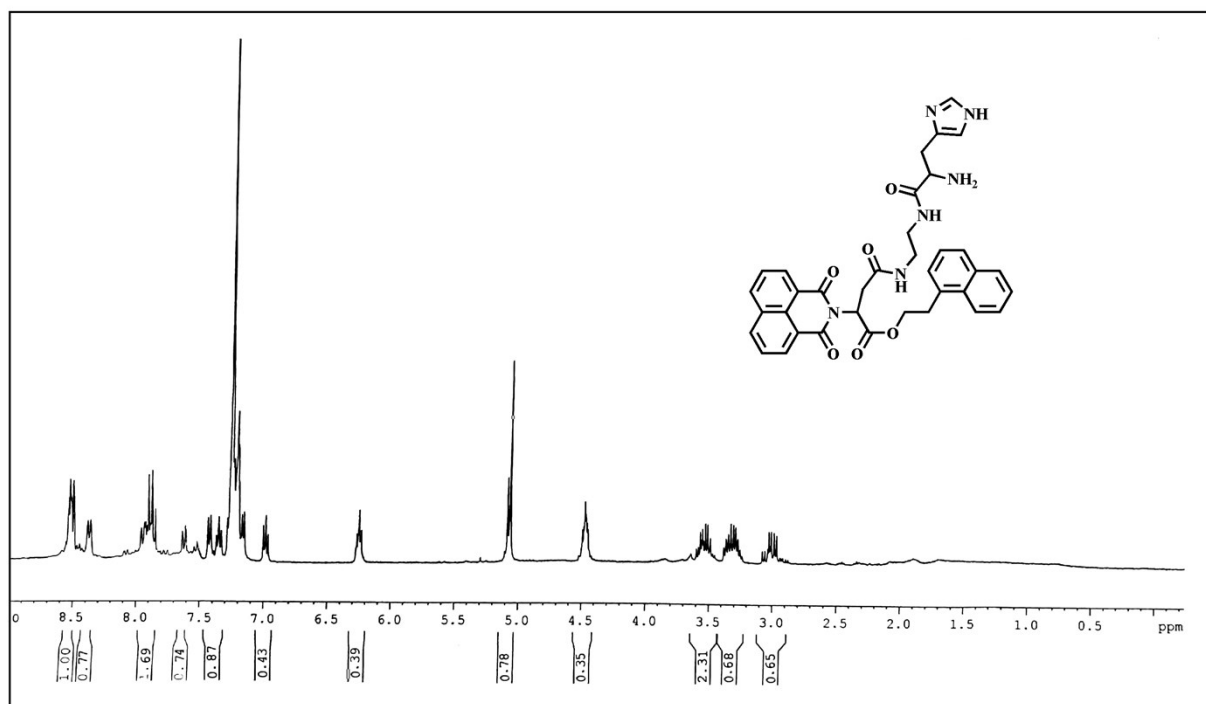

**Fig. S1.** <sup>1</sup>H-NMR spectrum of NID.

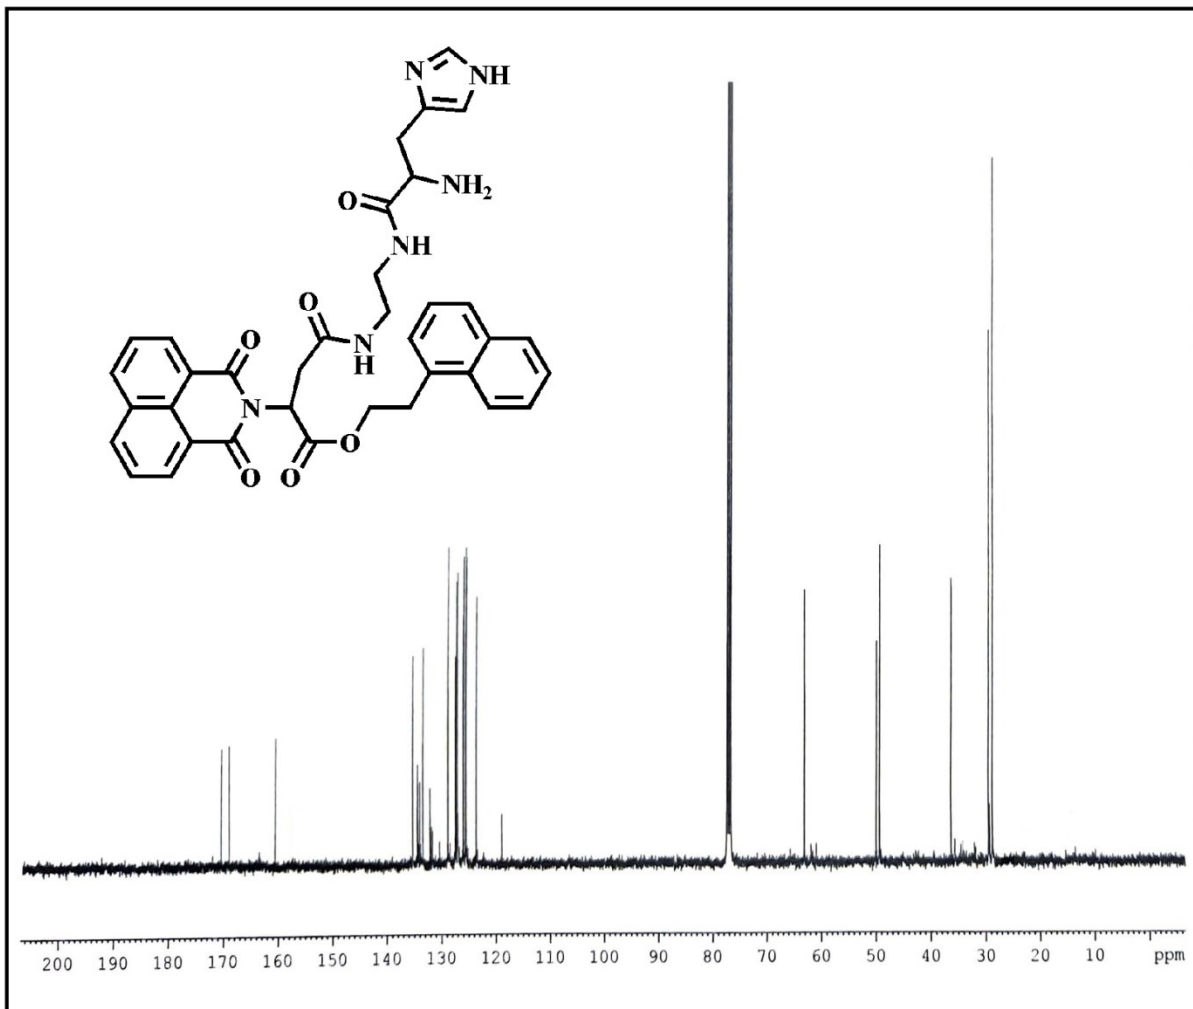

**Fig. S2.**  $^{13}\text{C}$ -NMR spectrum of NID.

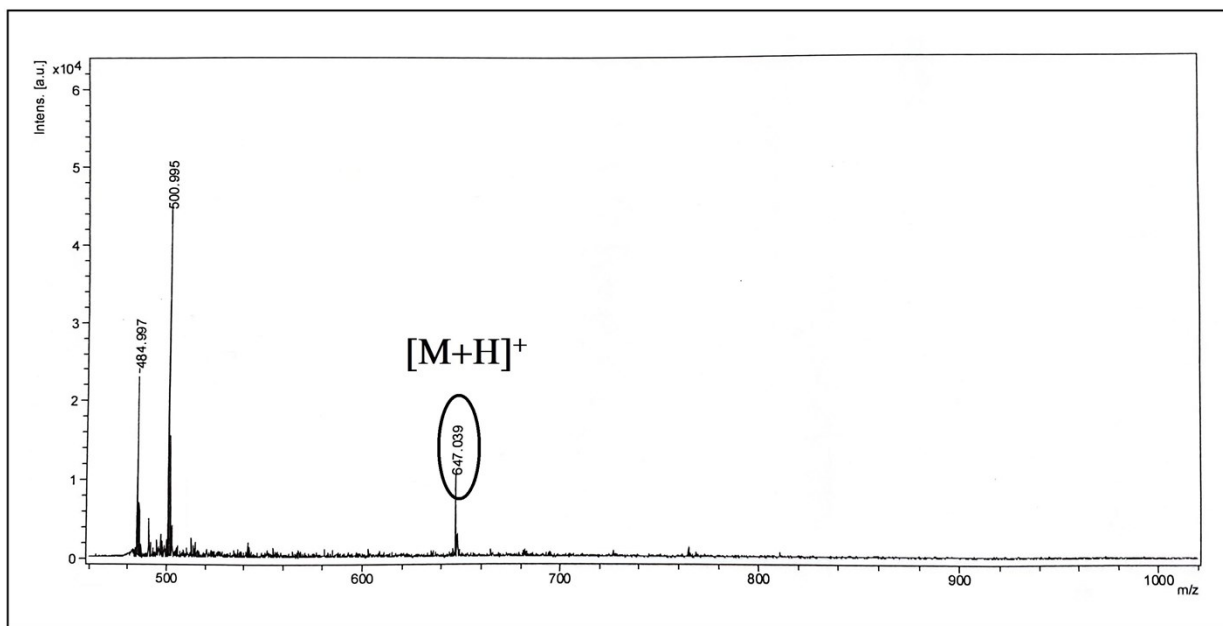

**Fig. S3.** Mass spectrum of **NID**.

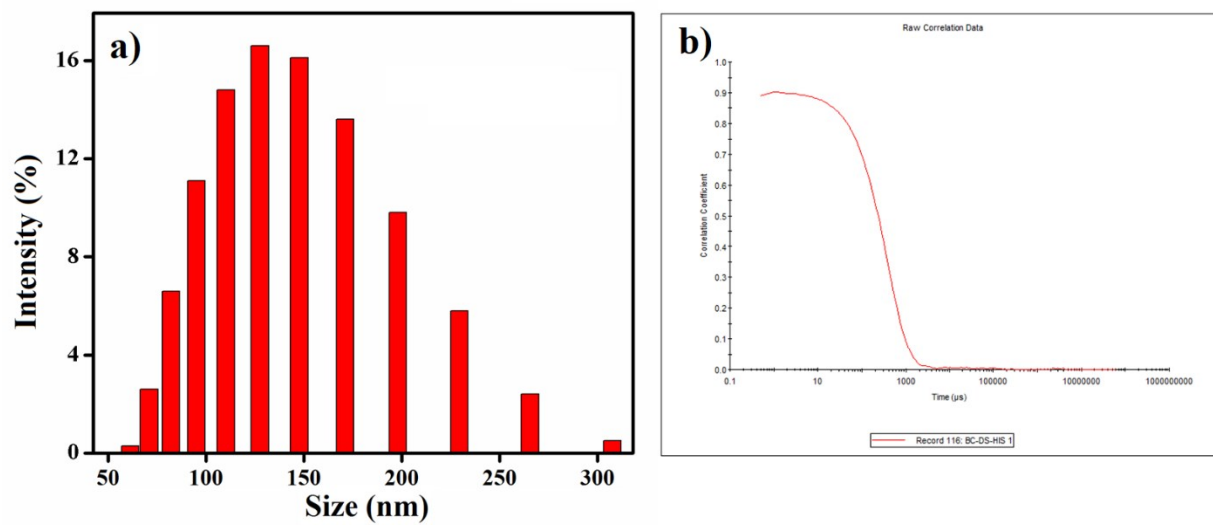

**Fig. S4.** (a) DLS plot of particles size distribution (intensity averaged), (b) correlogram obtained by DLS of **NID** in (1:99, v/v) DMSO-water binary solvent mixture ( $[\mathbf{NID}] = 10 \mu\text{M}$ ).



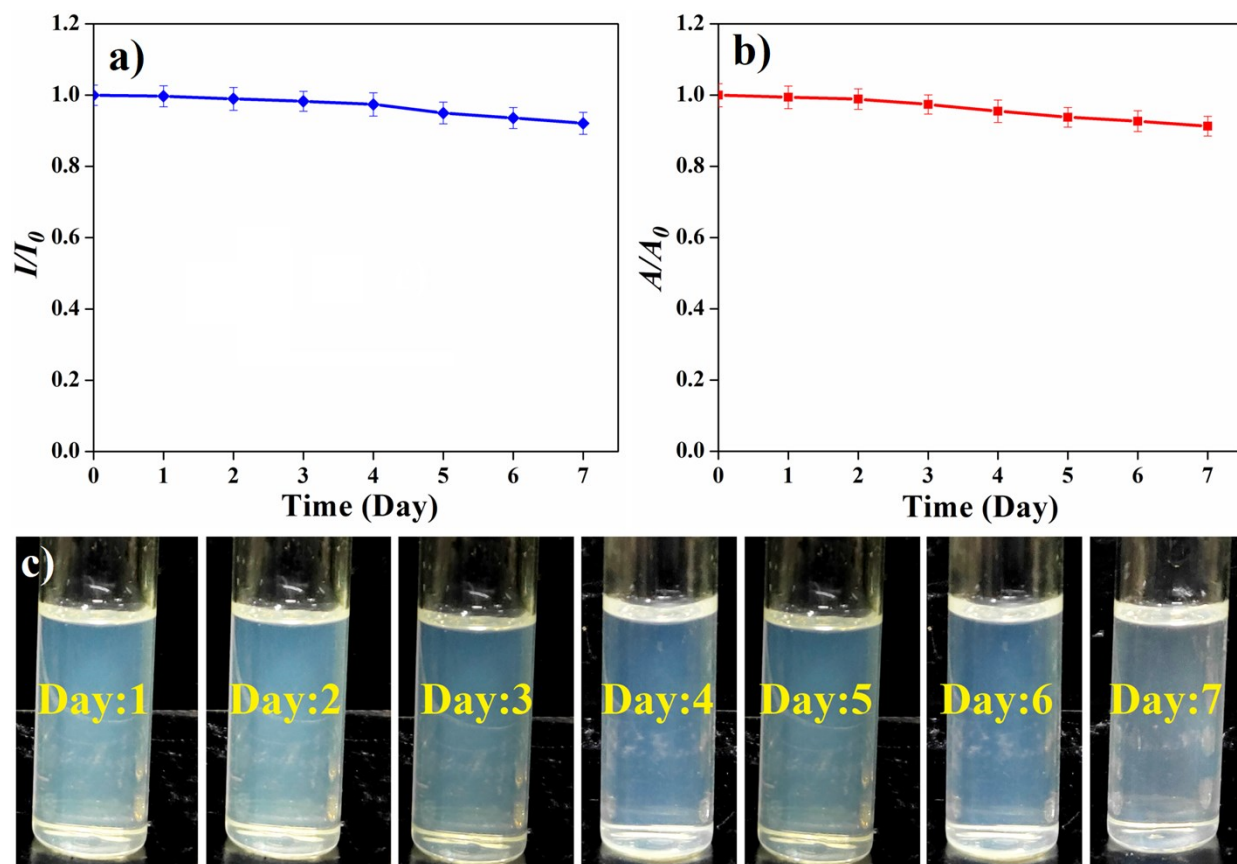

**Fig. S5.** Ratio of (a) absorbance value, (b) fluorescence intensity over time for **NID** FONP at  $f_w = 99$  vol% in DMSO. (c) photographs of **NID** FONP solution for 7 days.

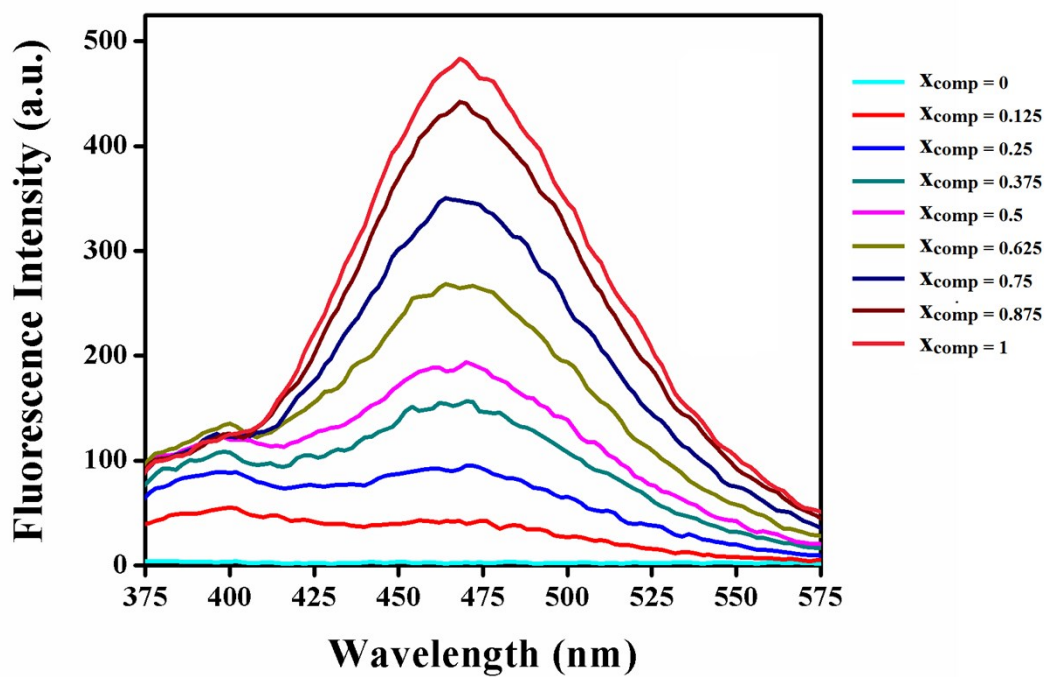

**Fig. S6.** Emission spectra of different mole fraction of **NID** /  $\text{Fe}^{3+}$  in 1:99 (v/v) DMSO-water.  $X_{comp}$  = Mole fraction of **NID**.

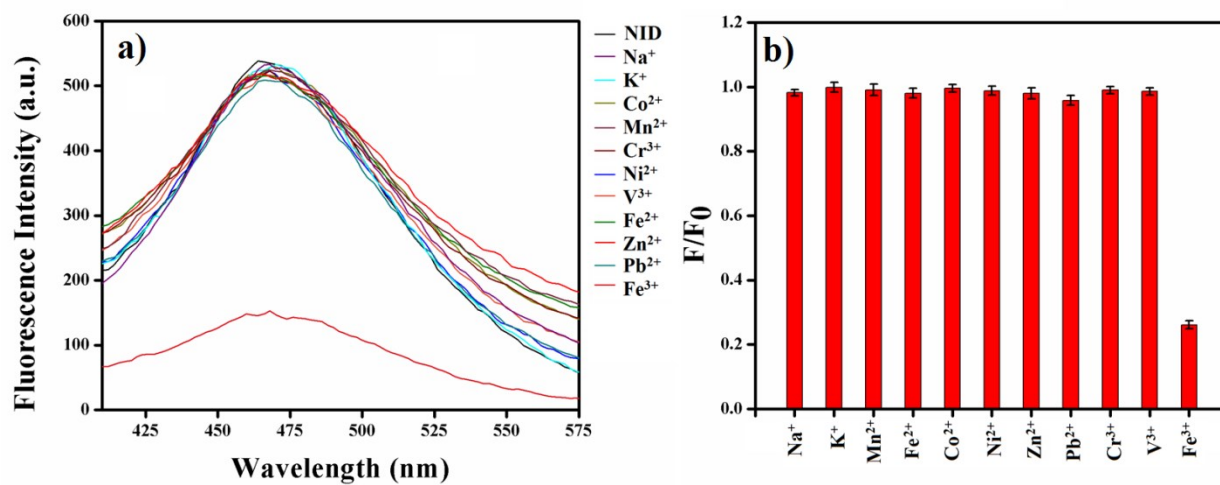

**Fig. S7.** Selectivity of **NID** FONPs ( $[\text{NID}] = 50 \mu\text{M}$ ) to  $\text{Fe}^{3+}$  over other metal ions  $[\text{metal}] = 500 \mu\text{M}$  in (1:99, v/v) DMSO-water solution. (a) Fluorescence intensity plot (b) relative intensity of **NID** FONPs in presence of different metal ions. The error bars represent the standard deviations.

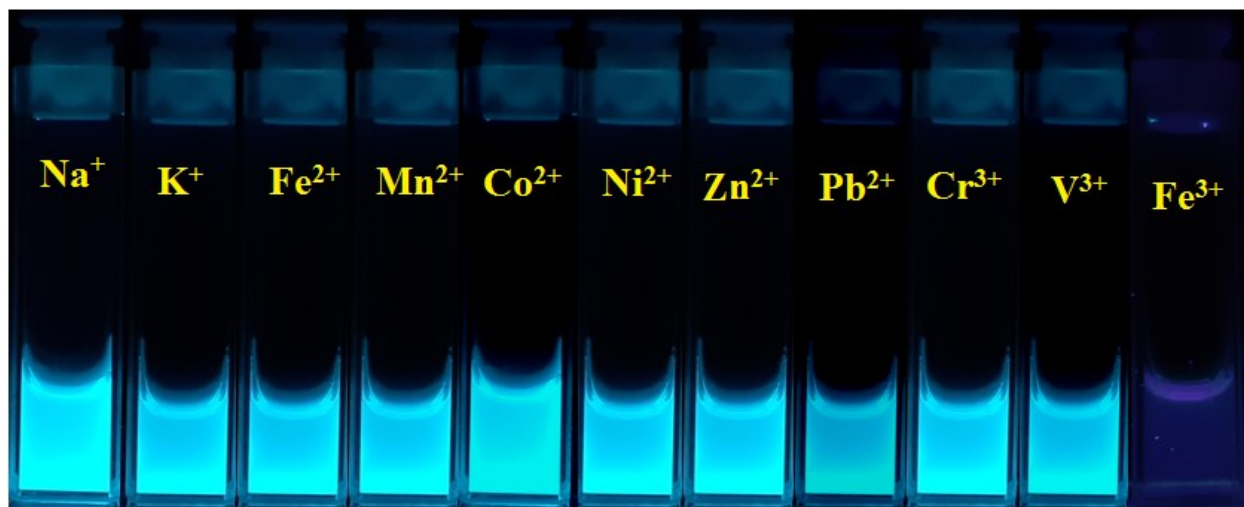

**Fig. S8.** Photograph of selectivity of **NID** FONPs ( $[\text{NID}] = 50 \mu\text{M}$ ) to  $\text{Fe}^{3+}$  over other metal ions ( $500 \mu\text{M}$ ) in (1:99, v/v) DMSO-water solution upon UV-light irradiation ( $\lambda_{\text{ex}} = 365 \text{ nm}$ ).

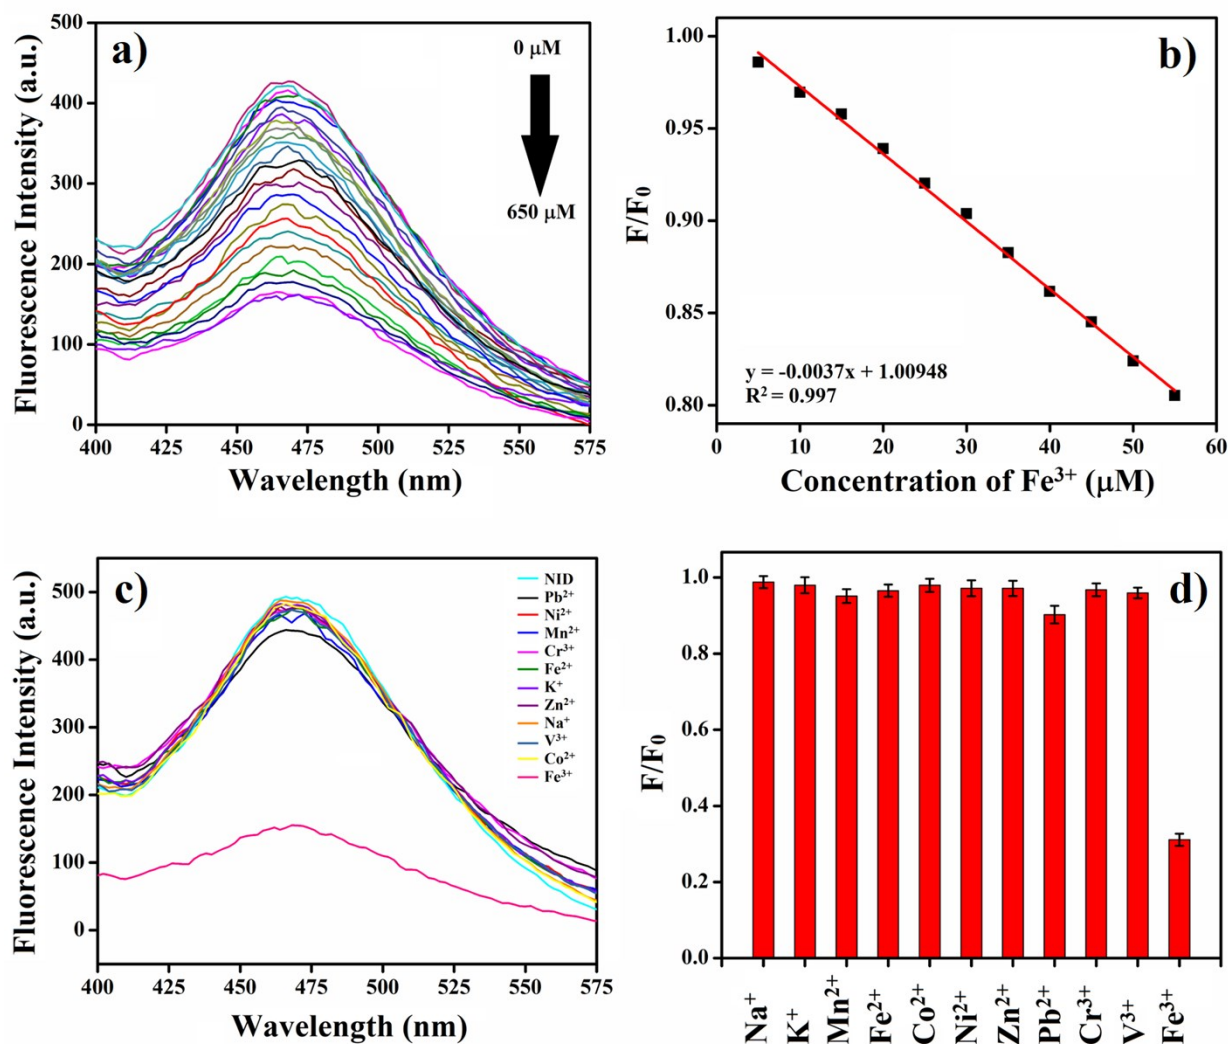

**Fig. S9.** (a) Fluorescence spectra of **NID** FONPs (50 μM) in absence and presence of varying concentration of Fe<sup>3+</sup> (excitation wavelength = 350 nm), (b) Stern-Volmer plot of Fe<sup>3+</sup> doped in (1:99, v/v) DMSO-aqueous phosphate buffer (10 mM, pH = 7.4) solution of **NID** (50 μM), Selectivity of **NID** FONPs ([**NID**] = 50 μM) to Fe<sup>3+</sup> over other metal ions [metal] = 500 μM in (1:99, v/v) DMSO-aqueous phosphate buffer (10 mM, pH = 7.4) solution. (c) Fluorescence intensity plot (d) relative intensity of **NID** FONPs in presence of different metal ions. The error bars represent the standard deviations.

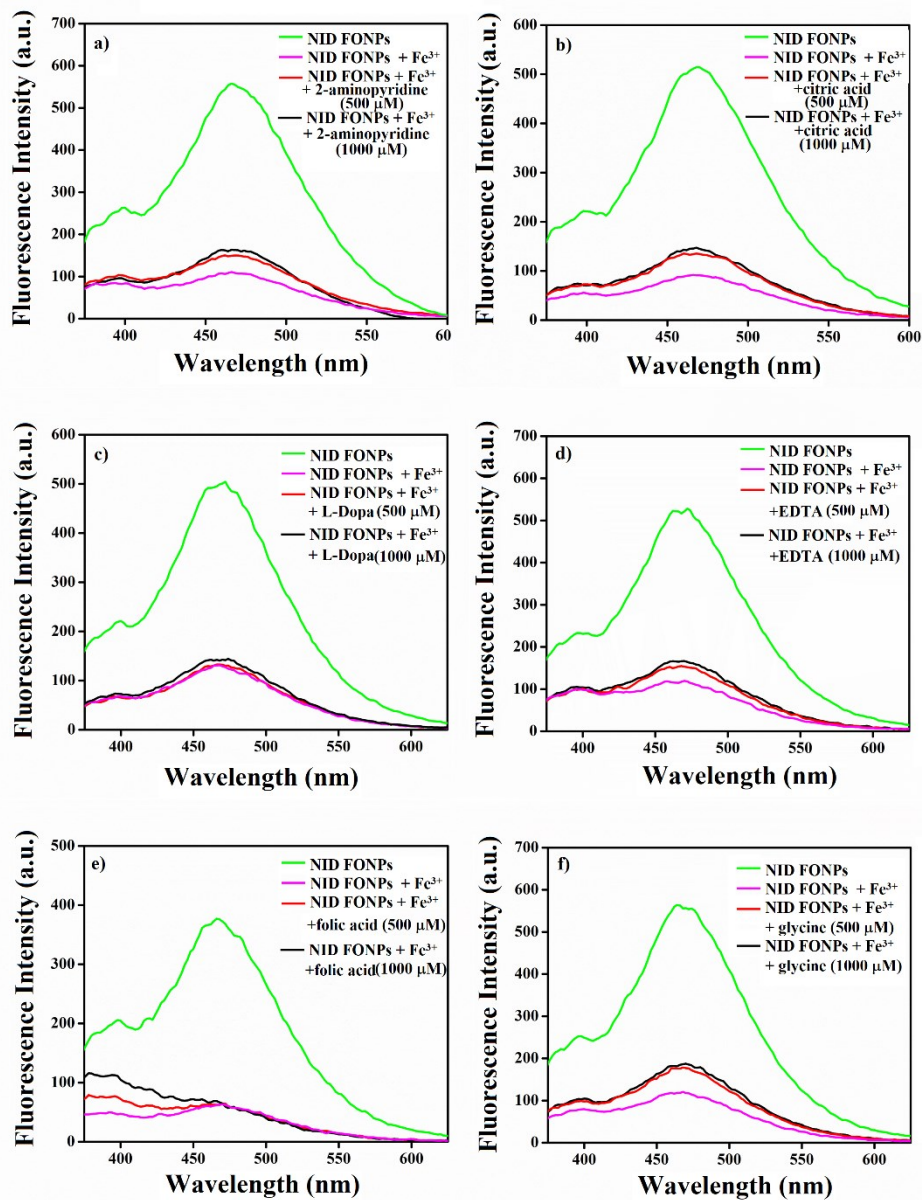

**Fig. S10.** Emission spectra of of **NID** FONPs (50  $\mu\text{M}$ ) and mixture of **NID** FONPs (50  $\mu\text{M}$ ) +  $\text{Fe}^{3+}$  (500  $\mu\text{M}$ ) in absence and presence of 500 & 1000  $\mu\text{M}$  of (a) 2-aminopyridine, (b) citric acid, (c) L-Dopa, (d) EDTA, (e) folic acid and (f) glycine.

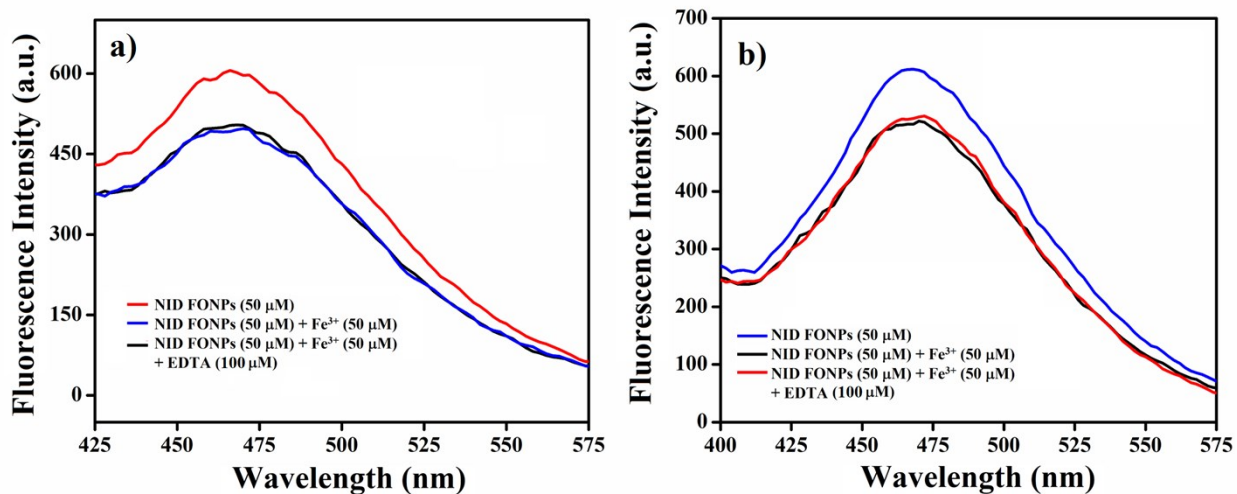

**Fig. S11.** Emission spectra of **NID** FONPs (50  $\mu\text{M}$ ) and mixture of **NID** FONPs (50  $\mu\text{M}$ ) +  $\text{Fe}^{3+}$  (50  $\mu\text{M}$ ) in absence and presence of 100  $\mu\text{M}$  EDTA in (a) Milli-Q water and (b) aqueous phosphate buffer (pH = 7.4, 10 mM).

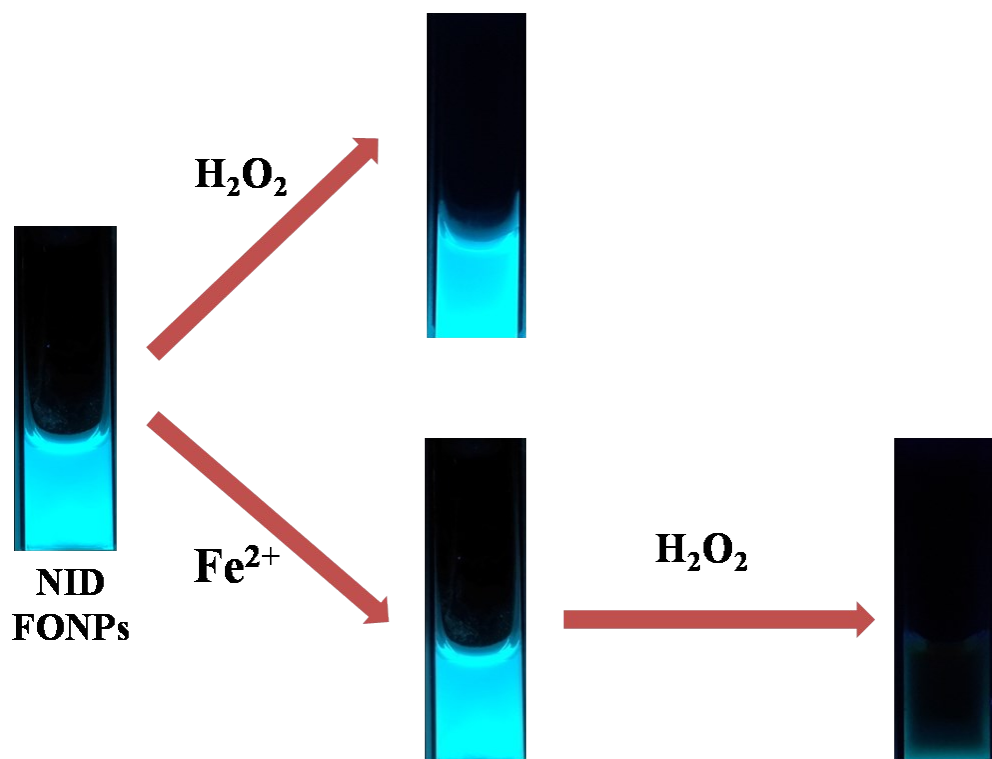

**Fig. S12.** Photographs **NID** FONPs ( $[\text{NID}] = 50 \mu\text{M}$ ), **NID** FONPs +  $\text{Fe}^{2+}$  ( $[\text{NID}] = 50 \mu\text{M}$ ,  $[\text{Fe}^{2+}] = 500 \mu\text{M}$ ), **NID** FONPs +  $\text{H}_2\text{O}_2$  ( $[\text{NID}] = 50 \mu\text{M}$  and  $[\text{H}_2\text{O}_2] = 500 \mu\text{M}$ ) and **NID** FONPs +  $\text{Fe}^{2+}$  +  $\text{H}_2\text{O}_2$  ( $[\text{NID}] = 50 \mu\text{M}$ ,  $[\text{Fe}^{2+}] = 500 \mu\text{M}$  and  $[\text{H}_2\text{O}_2] = 500 \mu\text{M}$ ) in (1:99, v/v) DMSO-water solution upon UV-light irradiation ( $\lambda_{\text{ex}} = 365 \text{ nm}$ ).



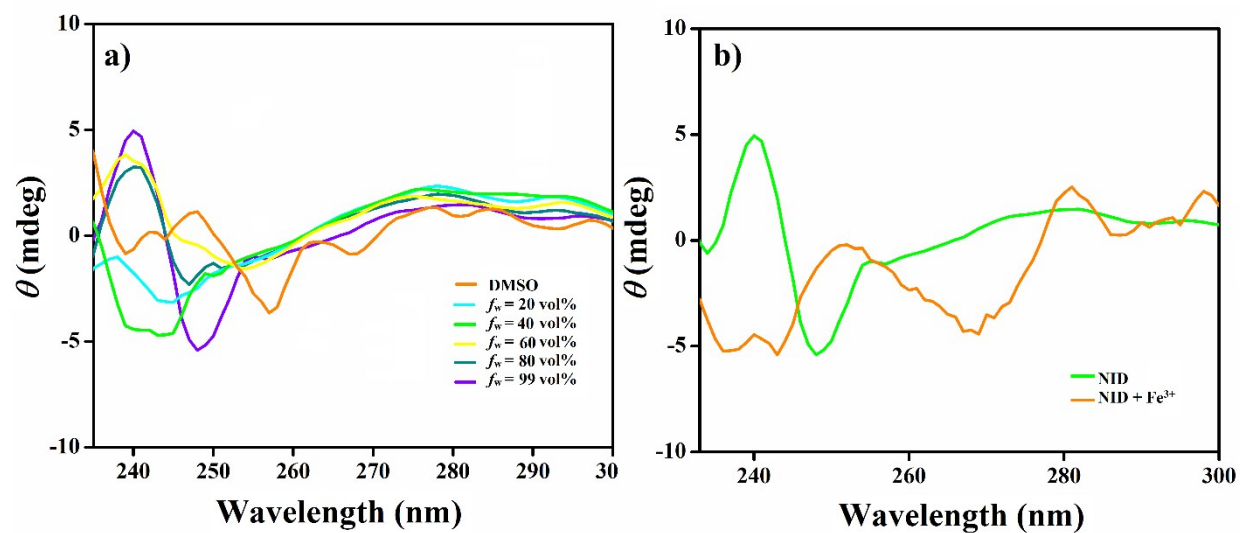

**Fig. S13.** CD spectra of (a) **NID** (500  $\mu\text{M}$ ) in different ratios of DMSO-water, (b) **NID** (500  $\mu\text{M}$ ) at  $f_w = 99\%$  in DMSO in presence of  $\text{Fe}^{3+}$  (5 mM).

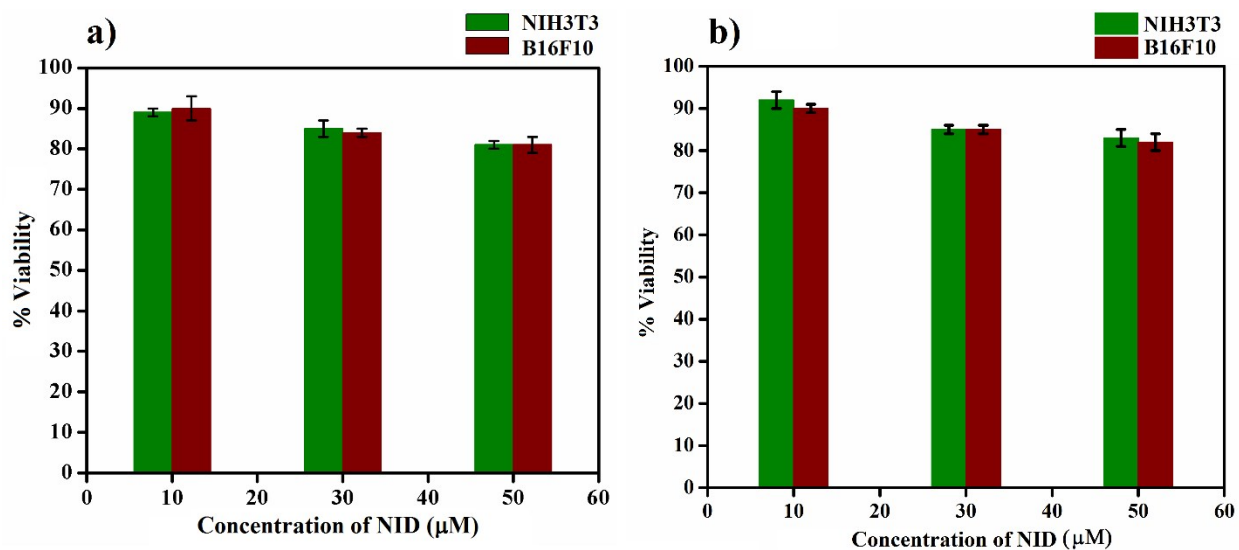

**Fig. S14.** MTT-based % cell viability of NIH3T3 (non-cancer cells) and B16F10 (cancer cells) in presence of varying concentration of FONPs derived from NID in 1:99 v/v, DMSO-water over the incubation period of (a)12 h, (b) 24 h. Percent errors are within  $\pm 5\%$  in triplicate experiments.

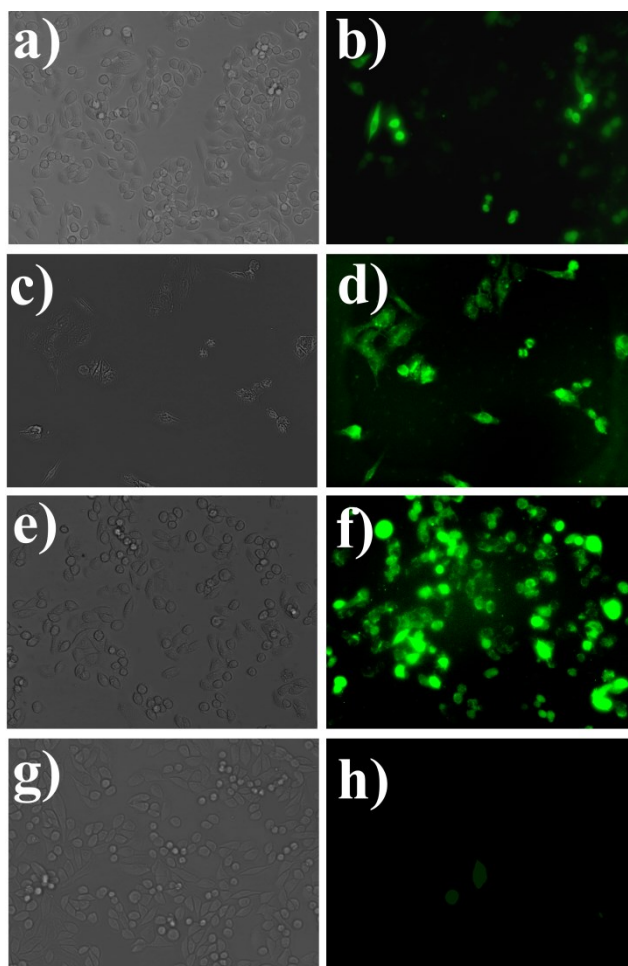

**Fig. S15.** Bright-field, fluorescence microscopic images of NIH3T3 cells after incubation with **NID** FONPs (25  $\mu\text{M}$ ) for 3 h (a,b) and 6 h (c,d) , incubation with **NID** FONPs (25  $\mu\text{M}$ ) +  $\text{Fe}^{2+}$ (250  $\mu\text{M}$ ), (e, f) **NID** FONPs (25  $\mu\text{M}$ ) +  $\text{Fe}^{3+}$ (250  $\mu\text{M}$ ) (g, h) for 6 h.

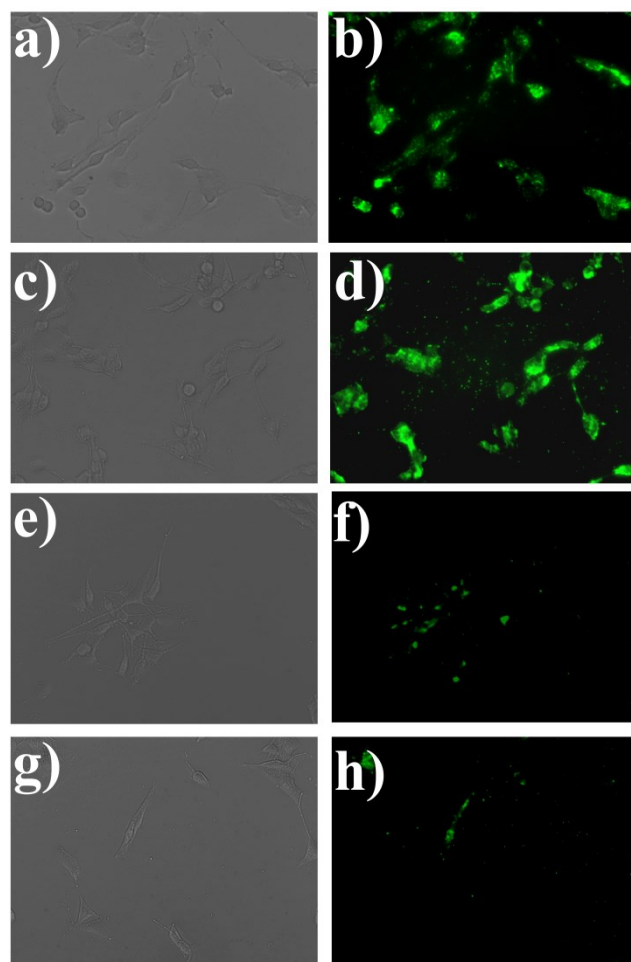

**Fig. S16.** Bright-field, fluorescence microscopic images of B16F10 cells after incubation with **NID** FONPs (25  $\mu$ M) for 3 h (a,b) and 6 h (c,d), incubation with **NID** FONPs (25  $\mu$ M) +  $\text{Fe}^{2+}$ (250  $\mu$ M), (e, f) **NID** FONPs (25  $\mu$ M) +  $\text{Fe}^{3+}$ (250  $\mu$ M) (g, h) for 6 h.

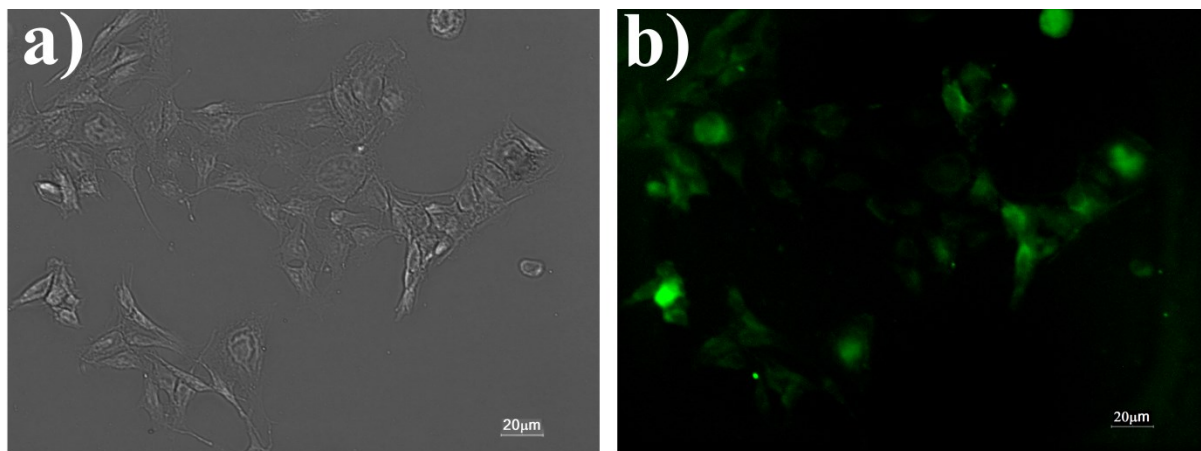

**Fig. S17:** a) Bright-field, b) fluorescence microscopic image of co-cultured NIH3T3 and B16F10 cells after 6 h incubation with **NID** FONPs (25 μM) + Fe<sup>2+</sup> (250 μM).
